# Supplementary material
Source: publisher site journal article supplement (https://www.degruyter.com/supplemental/journals/opli/opli-overview.xml/Effects_of_Animacy_in_Grammar_and_Cognition.pdf)
Supplement: Supplementary file 1 [file Effects_of_Animacy_in_Grammar_and_Cognition.pdf]

# EFFECTS OF ANIMACY IN GRAMMAR AND COGNITION

## GUEST EDITORS

---

Diane Nelson and Virve Vihman

## DESCRIPTION

---

Most, if not all, of the world's languages exhibit "animacy effects", whereby grammatical structures interact with the relative animacy of noun referents, as represented on hierarchies or scales of varying degrees of granularity, with human discourse participants at one end and inanimate objects at the other (Silverstein 1976; Dixon 1979; Corbett 1991, 2012; Lockwood & Macaulay 2012). Ample cross-linguistic evidence demonstrates that animacy conditions a wide range of linguistic phenomena, and we witness complex effects of animacy that require (a) subtler distinctions than would be expected from a binary contrast [ $\pm$  animate] and (b) more sophisticated analyses than e.g. a simple mapping of higher animacy to higher grammatical role.

In this Special Issue, we align the linguistic interest in the grammatical effects of animacy with broader questions concerning animacy in cognition, including the origins of animacy as a central linguistic element, the biases which shape how we attend to animacy distinctions and the ways in which animacy affects discourse structure and narrative. Recent work in cognitive science and adjacent fields has contributed much to the understanding of why animacy plays such a central role across linguistic domains. Yet, while there is a general understanding that sensitivity to animacy is a property central to human cognition, its role in the grammars of the world's languages is extremely diverse, and there is no clear consensus on how to incorporate animacy within linguistic theories.

The papers in this SI provide an updated look at the state of the field today through a cross-theoretical, interdisciplinary approach. This SI focusses on the cognitive status and construal of animacy in order to extend our understanding of its role in grammar(s), discourse and theoretical approaches.

## CONTENT

---

### **Effects of Animacy in Grammar and Cognition: Introduction to Special Issue**

Virve-Anneli Vihman, Diane Nelson

### **How Animacy and Natural Gender Constrain Morphological Complexity: Evidence from Diachrony**

Iván Igartua, Ekaitz Santazilia

### **Interspecies Identification in Nature Observations: Modal Expressions and Open Reference Constructions with Non-Human Animate Reference in Finnish**

Rea Peltola

### **Animacy Distinctions Arise from Iterated Learning**

Virve-Anneli Vihman, Diane Nelson, Simon Kirby

### **Animacy and Affectedness in Germanic Languages**

Jens Fleischhauer

**Effects of perspective-taking on pronominal reference to humans and animals: Logophoricity in Finnish**

Elsi Kaiser

**The language of an inanimate narrator**

Thijs Trompenaars, Lotte Hogeweg, Helen de Hoop, Wessel Stoop

**The role of case and animacy in bi-and monolingual children's sentence interpretation in German: a developmental perspective**

Gamper, Jana

**Gradient Effects of Animacy on Differential Object Marking in Turkish**

Krause, Elif / von Heusinger, Klaus

**Humans, Animals, Things and Animacy**

Bayanati, Shiva / Toivonen, Ida

**How Animacy and Verbal Information Influence V2 Sentence Processing: Evidence from Eye Movements**

de Swart, Peter / van Bergen, Geertje
